# Supplementary material for: Lack of TXNIP Protects Against Mitochondria-Mediated Apoptosis but Not Against Fatty Acid–Induced ER Stress–Mediated β-Cell Death
Source: PubMed Central journal article supplement — Diabetes. 2009 Oct 29;59(2):440–7. doi: 10.2337/db09-0949 (PMC2809961; doi:10.2337/db09-0949), 2009-10-29
Supplement: supp_db09-0949_compREV-Supplement.pdf [file supp_db09-0949_compREV-Supplement.pdf]

## Supplement Figure Legend:

### Figure S1

**Dose-dependent effects of palmitate on beta cell apoptosis.** Isolated primary islets of wild-type C3H mice were incubated at 11.1 mM glucose for 24h at the designated concentrations of palmitate, whereby the molar ratio of fatty acid:BSA was kept constant at (5:1). Apoptosis was then assessed and quantified by Western blotting for cleaved caspase-3 corrected for by  $\beta$ -actin (**A and B**) or by TUNEL (**C**).

### Figure S2

**Palmitate-induced ER-stress response in INS-1 cells and primary islets.** INS-1 cells were incubated at 11.1 mM glucose with or without palmitate (1mM) for 24 h and the mRNA expression of the ER-stress markers BiP (**A**) and CHOP (**B**) was analyzed by quantitative real-time RT-PCR and corrected for 18S. Primary rat islets were incubated for 24 h at 16.7 mM glucose with or without palmitate and analyzed for BiP (**C**) and CHOP (**D**) as above. Bars represent mean fold change  $\pm$ SEM of at least four independent experiments.

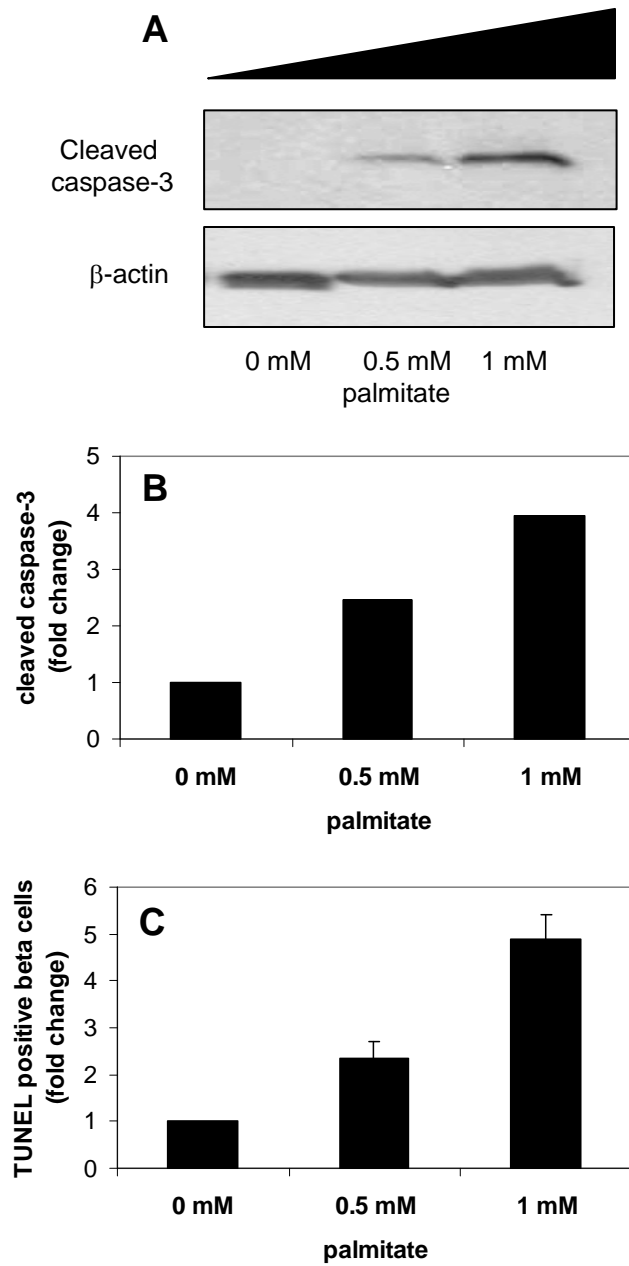

Fig. S1

**INS-1 cells:**

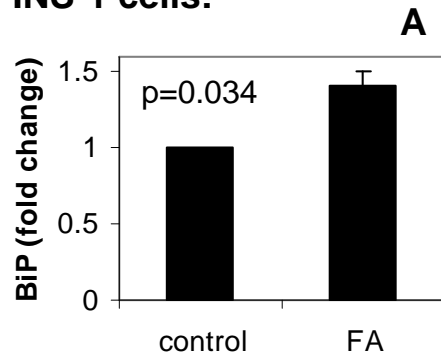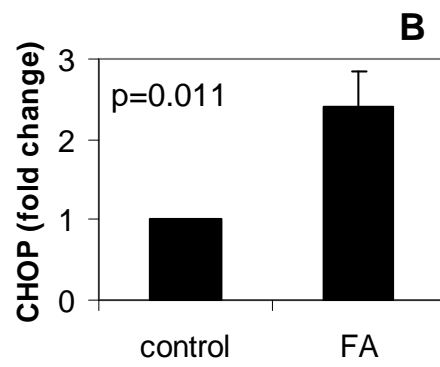

**Primary islets:**

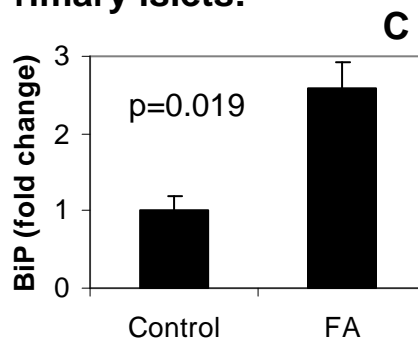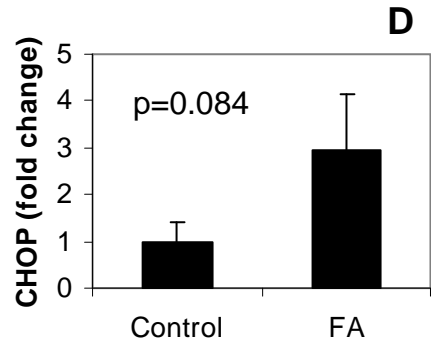

Fig. S2
